# Supplementary material for: Seamless integration of a nickel-based metal–organic framework with three-dimensional substrates for nonenzymatic glucose sensing
Source: Royal Society of Chemistry journal article supplement (doi:10.1039/d4dt00335g), 2024-01-01
Supplement: d4dt00335g1.pdf [file d4dt00335g1.pdf]

## Supplementary Information

### Seamless Integration of Ni Metal–Organic Framework on Three-Dimensional Substrates for Nonenzymatic Glucose Sensing

Haonan Ren<sup>1</sup>, Fan Yang<sup>1,\*</sup>, Meng Cao<sup>1</sup>, Bin Shan<sup>2</sup>, Rong Chen<sup>1,\*</sup>

<sup>1</sup> *State Key Laboratory of Intelligent Manufacturing Equipment and Technology, School of Mechanical Science and Engineering, Huazhong University of Science and Technology, Wuhan 430074, People's Republic of China*

<sup>2</sup> *State Key Laboratory of Materials Processing and Die & Mould Technology, School of Materials Science and Engineering, Huazhong University of Science and Technology, Wuhan 430074, People's Republic of China*

\* Corresponding authors:

Fan Yang – Email: [fan\\_yang@hust.edu.cn](mailto:fan_yang@hust.edu.cn)

Rong Chen – Email: [rongchen@mail.hust.edu.cn](mailto:rongchen@mail.hust.edu.cn)

## Outline

**Fig. S1** SEM images of NiO/NF and Ni-MOF/NF.

**Fig. S2** SEM image of Ni-MOF powder.

**Fig. S3** Full XRD pattern of Ni-MOF/NF.

**Fig. S4** CV curves of Ni-MOF/NF (DC) electrodes with different loading masses of Ni-MOF powder.

**Fig. S5** CV curves of Ni-MOF/NF and calibration curves of peak current versus the square root of the scan rate with glucose.

**Fig. S6** CV curves of Ni-MOF/NF (DC) and calibration curves of peak current versus the square root of the scan rate with glucose.

**Fig. S7** CV curves of Ni-MOF/NF with different glucose concentrations.

**Fig. S8** Equivalent circuit diagram and the fitted results of EIS for Ni-MOF/NF and Ni-MOF/NF (DC).

**Fig. S9** Optimal potential test for Ni-MOF/NF.

**Fig. S10** Step response curve of Ni-MOF/NF.

**Fig. S11** CV curves of Ni-MOF/NF and Ni-MOF/NF (DC) in non-faradaic potential range.

**Fig. S12** Calibration curves of the capacitive current density versus scan rate.

**Fig. S13** ECSA normalized current response.

**Table S1** Comparison of nanomaterials-based nonenzymatic glucose sensing electrodes.

**Fig. S14** Current responses of Ni-MOF/NF to different interferents and glucose.

**Fig. S15** CV curves of Ni-MOF/NF in the condition of different bending angles with glucose.

**Fig. S16** CV curves of Ni-MOF/NF in the condition of different bending counts with glucose.

**Fig. S17** SEM images of Ni-MOF/NF after electrochemical tests.

**Fig. S18** XRD pattern of Ni-MOF/NF after electrochemical tests.

**Fig. S19** Service life evaluation of Ni-MOF/NF.

**Fig. S20.** Equivalent circuit diagram and the fitted results of EIS for Ni-MOF/CP and Ni-MOF/CP (DC) in PBS.

**Table S2** Comparison of nonprecious metal nanomaterials-based nonenzymatic glucose sensing electrodes working in neutral condition.

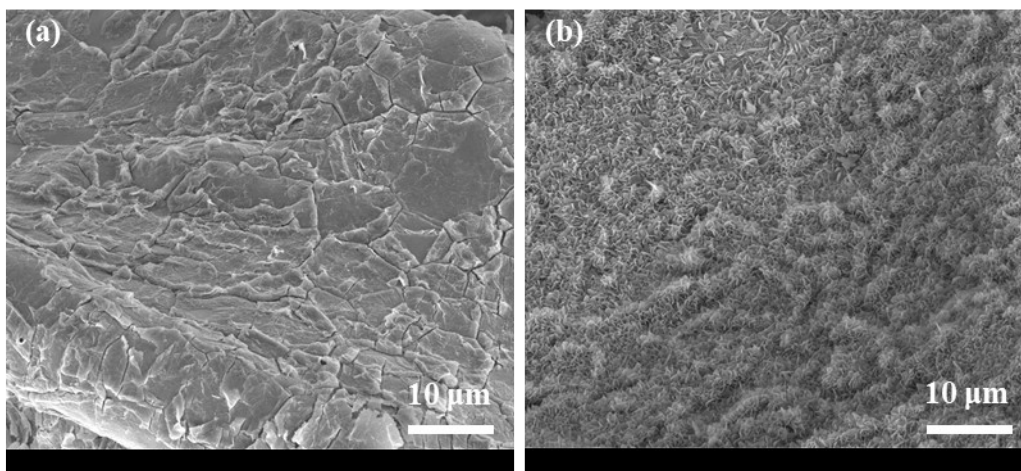

**Fig. S1** SEM images (a) NiO/NF and (b) Ni-MOF/NF at a different magnification.

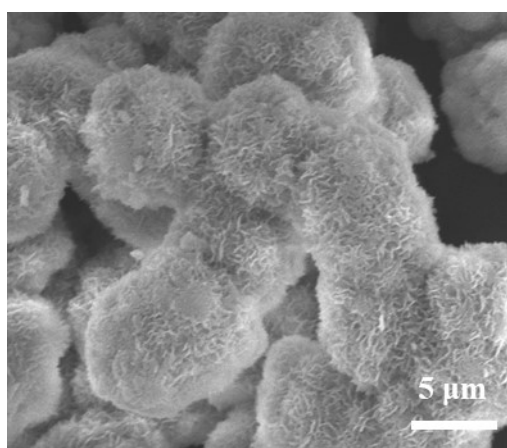

**Fig. S2** SEM image of Ni-MOF powder.

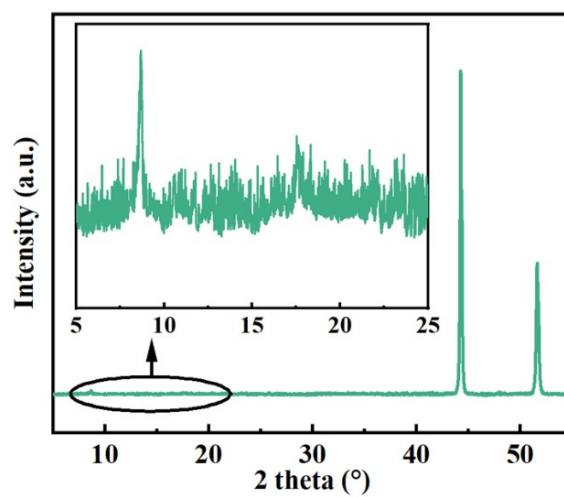

**Fig. S3** Full XRD pattern of Ni-MOF/NF.

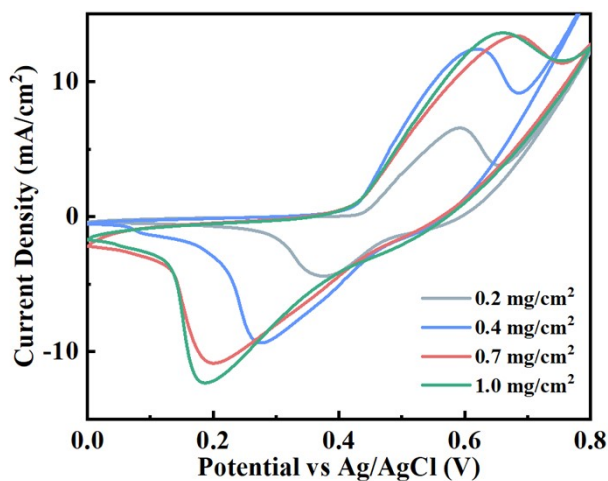

**Fig. S4** CV curves of Ni-MOF/NF (DC) electrodes with different loading mass of Ni-MOF powder in 0.1M NaOH with 0.5 mM glucose at scan rate of 30mV/s.

With the increase of loading mass from 0.2 to 0.4 mg/cm<sup>2</sup>, the anodic and cathodic peak currents had a significant increase. However, when the loading mass reached 0.7 mg/cm<sup>2</sup> and 1.0 mg/cm<sup>2</sup>, CV curves exhibited basically the same characteristics, which are close to that of 0.4 mg/cm<sup>2</sup>. Additionally, excessive loading mass could lead to issues including materials delamination and detachment, thereby affecting the reproducibility of the electrode. Consequently, 0.4 mg/cm<sup>2</sup> was selected as the optimal loading mass to drop-cast Ni-MOF/NF (DC) electrode.

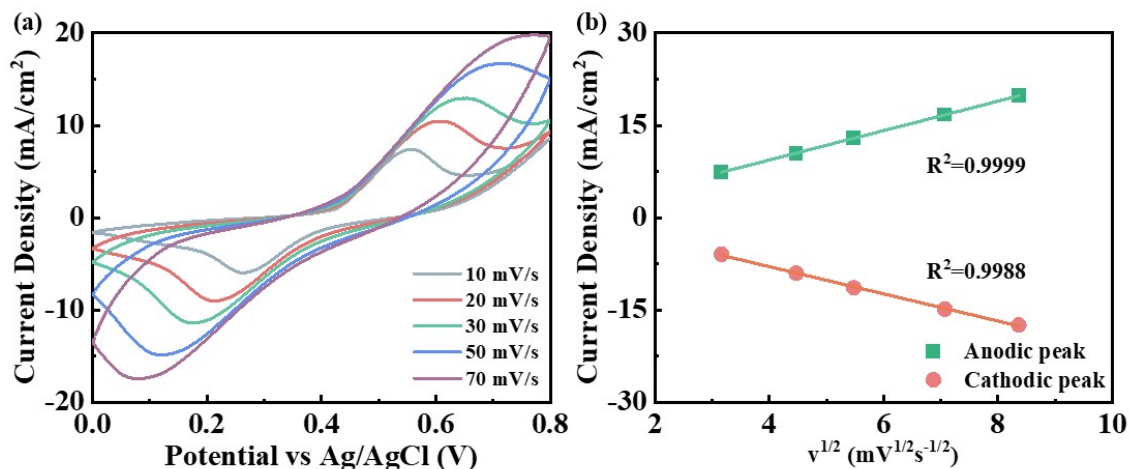

**Fig. S5** (a) CV curves of Ni-MOF/NF in 0.1 M NaOH with 0.5 mM glucose at different scan rates. (b) Calibration curves of anodic and cathodic peak current versus the square root of the scan rate.

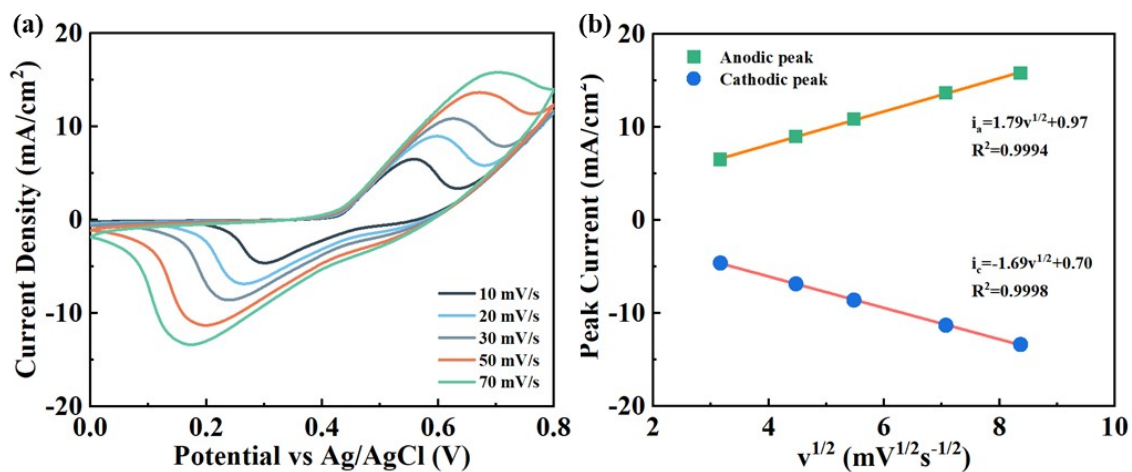

**Fig. S6** (a) CV curves of Ni-MOF/NF (DC) in 0.1 M NaOH with 0.5 mM glucose at different scan rates. (b) Calibration curves of anodic and cathodic peak current versus the square root of the scan rate.

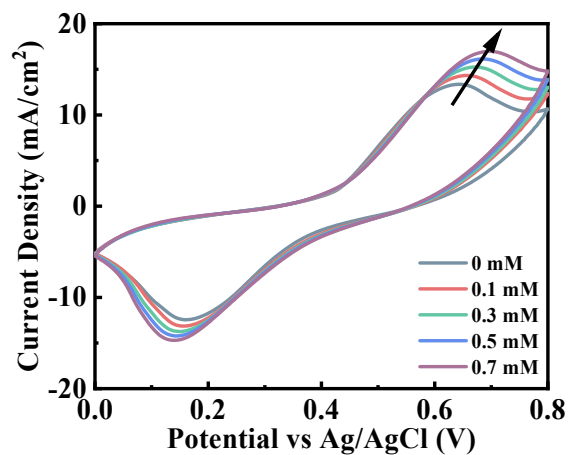

**Fig. S7** CV curves of Ni-MOF/NF with different glucose concentrations in NaOH, scan rate: 30 mV/s.

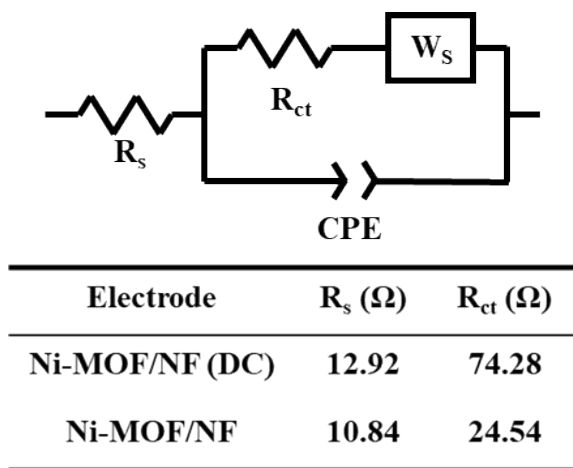

**Fig. S8** Equivalent circuit diagram and the fitted results of EIS for Ni-MOF/NF and Ni-MOF/NF (DC) in NaOH.

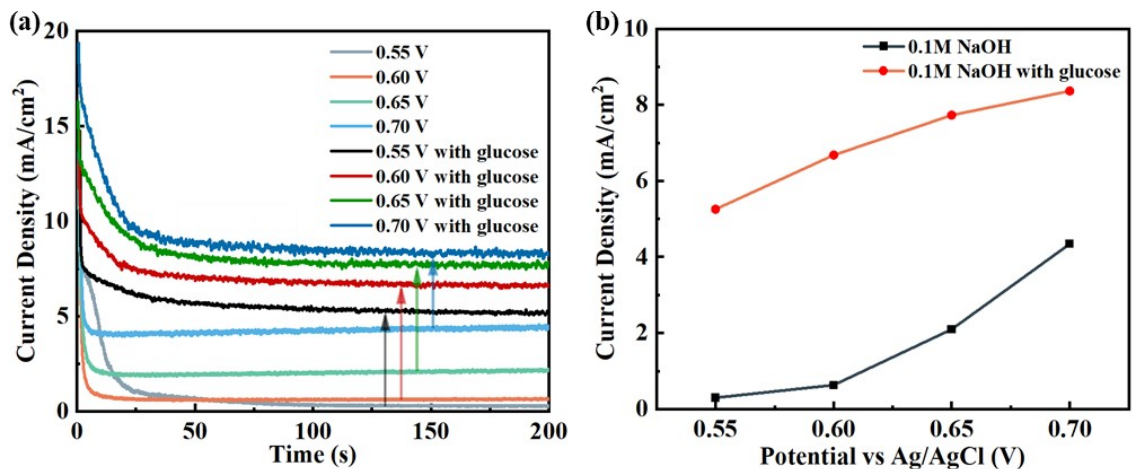

**Fig. S9** (a) i-t curves of Ni-MOF/NF with and without 0.5 mM glucose at different potentials. (b) Amperometric responses at different potentials with and without 0.5 mM glucose.

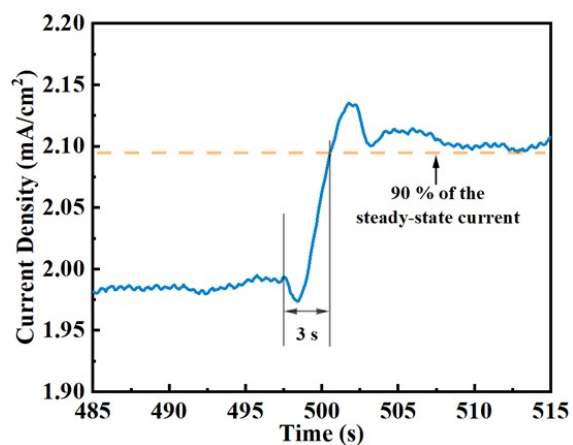

**Fig. S10** i-t curve of Ni-MOF/NF at 0.6 V when adding 10  $\mu$ M of glucose at 500 s.



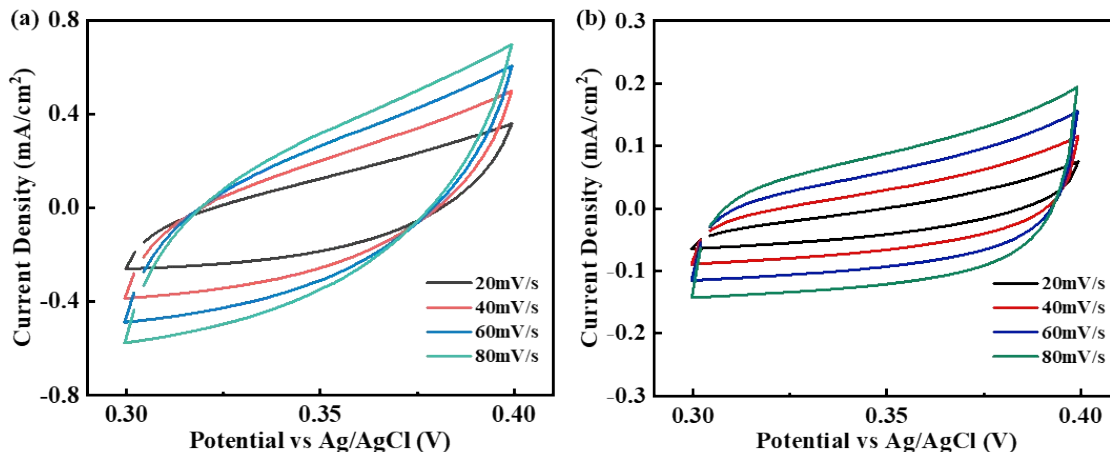

**Fig. 11** CV curves of (a) Ni-MOF/NF and (b) Ni-MOF/NF (DC) at different scan rates in the potential range from 0.3 V to 0.4 V in 0.1 M NaOH with 0.1 mM glucose.

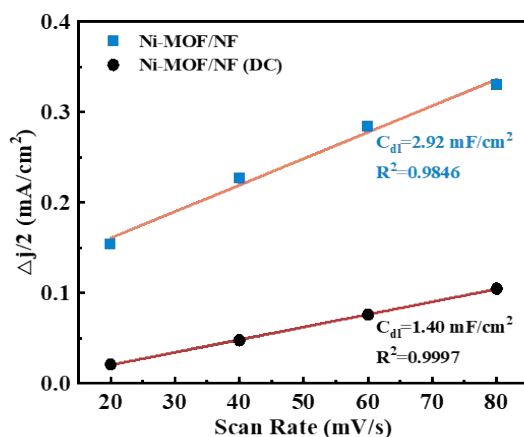

**Fig. 12** Calibration curves of the capacitive current density (at 0.35 V) versus scan rate.

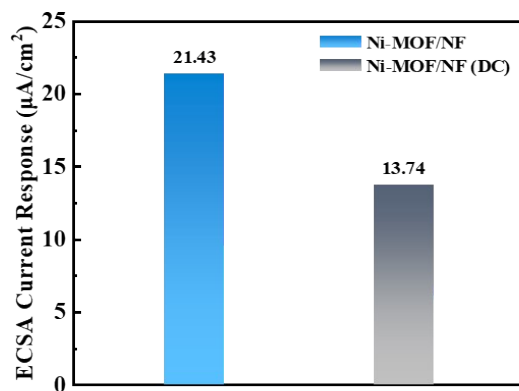

**Fig. 13** ECSA normalized current response upon 0.1 mM glucose at 0.6 V.

**Table S1** Comparison of nanomaterials-based nonenzymatic glucose sensing electrodes.

| Electrode                                    | Sensitivity<br>( $\mu\text{A mM}^{-1} \text{cm}^{-2}$ ) | Linear Range<br>( $\mu\text{M}$ ) | LOD<br>( $\mu\text{M}$ ) | Electrolyte | Ref.      |
|----------------------------------------------|---------------------------------------------------------|-----------------------------------|--------------------------|-------------|-----------|
| Ni-MOF/NF                                    | 14280                                                   | 4 ~ 536                           | 2.65                     | 0.1 M NaOH  | This work |
| Co-MOF/NF                                    | 10886                                                   | 1 ~ 3000                          | 0.0013                   | 0.1 M NaOH  | 1         |
| $\text{Cu}_1\text{Co}_2$ -MOF/NF             | 8304.4                                                  | 50 ~ 500                          | 23                       | 0.1 M NaOH  | 2         |
| NF/FLCo-ZIF                                  | 2981                                                    | 2 ~ 1000                          | 0.42                     | 0.1 M NaOH  | 3         |
| NF/ZIF-67@GO/Co(OH) <sub>2</sub>             | 2412.7                                                  | 1 ~ 8546                          | 0.934                    | 1 M KOH     | 4         |
| $\text{Ni}_3\text{Se}_2$ NS/NF               | 5962                                                    | 0.25 ~ 6335                       | 0.04                     | 0.5 M NaOH  | 5         |
| $\alpha$ -Fe <sub>2</sub> O <sub>3</sub> /NF | 10356                                                   | 5 ~ 200                           | 0.87                     | 0.1 M NaOH  | 6         |
| Cu(II)-HNFs@NF                               | 2497.1                                                  | 0.1 ~ 3000                        | 0.03                     | 0.1 M NaOH  | 7         |
| CuO/Ni(OH) <sub>2</sub> /CC                  | 598.6                                                   | 50 ~ 8500                         | 0.31                     | 0.1 M NaOH  | 8         |
| Ni/WO <sub>3</sub> MSBs@CC                   | 890                                                     | 5 ~ 255                           | 0.9                      | 0.1 M NaOH  | 9         |
| CuO polyhedrons/CC                           | 13575                                                   | 0.5 ~ 800                         | 0.46                     | 0.1 M NaOH  | 10        |

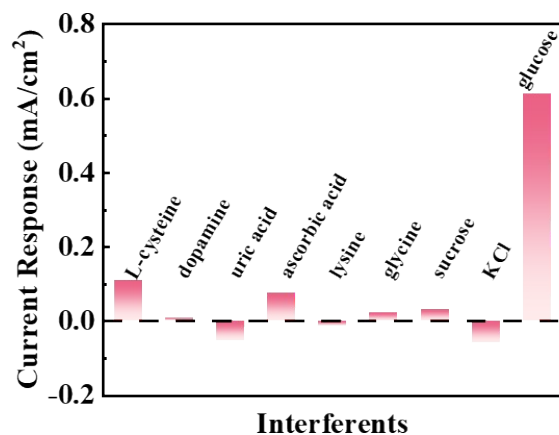

**Fig. S14** Current responses of Ni-MOF/NF to different interferents and glucose.

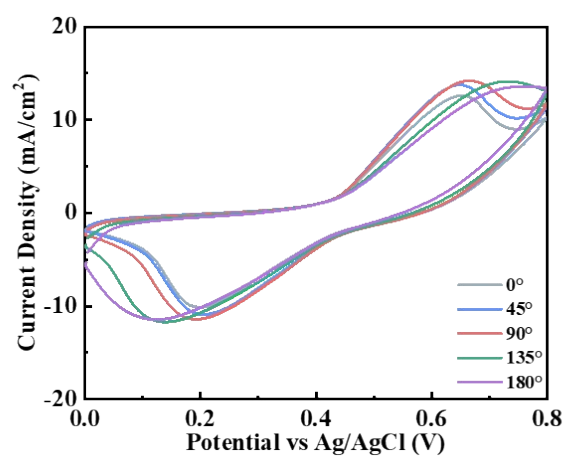

**Fig. S15** CV curves of Ni-MOF/NF with 0.5 mM glucose in NaOH at the scan rate of 30 mV·s<sup>-1</sup> in the condition of different bending angles.

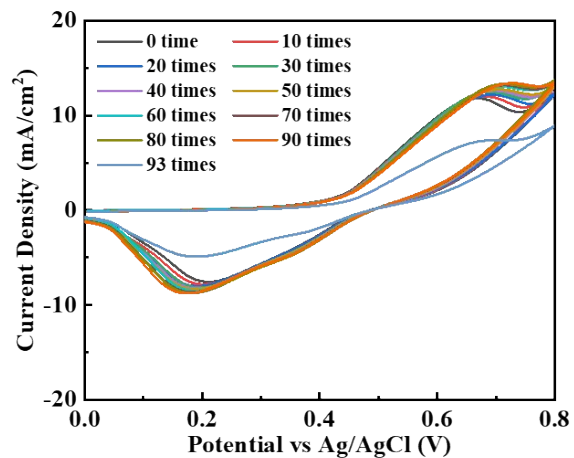

**Fig. S16** CV curves of Ni-MOF/NF with 0.5 mM glucose in NaOH at the scan rate of  $30 \text{ mV} \cdot \text{s}^{-1}$  in the condition of different bending counts.

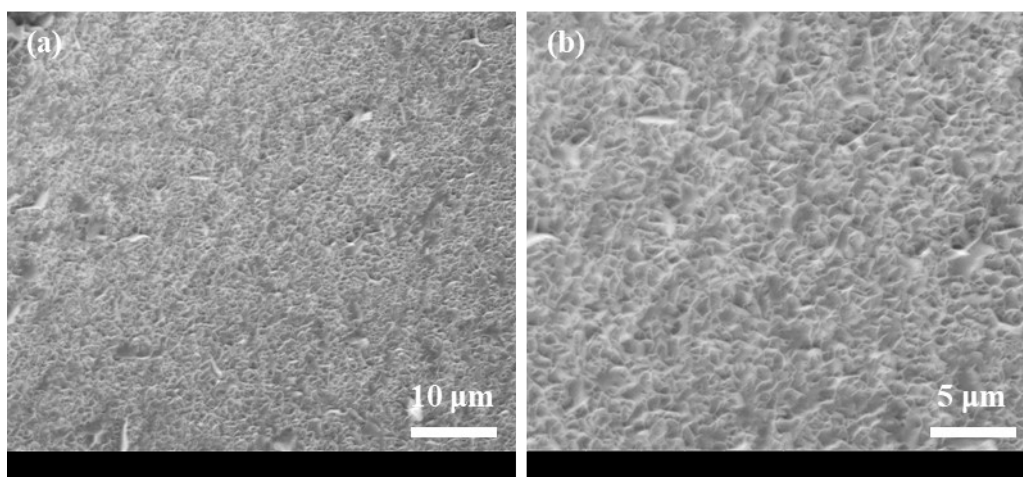

**Fig. S17** SEM images of Ni-MOF/NF at (a) low magnification and (b) high magnification.

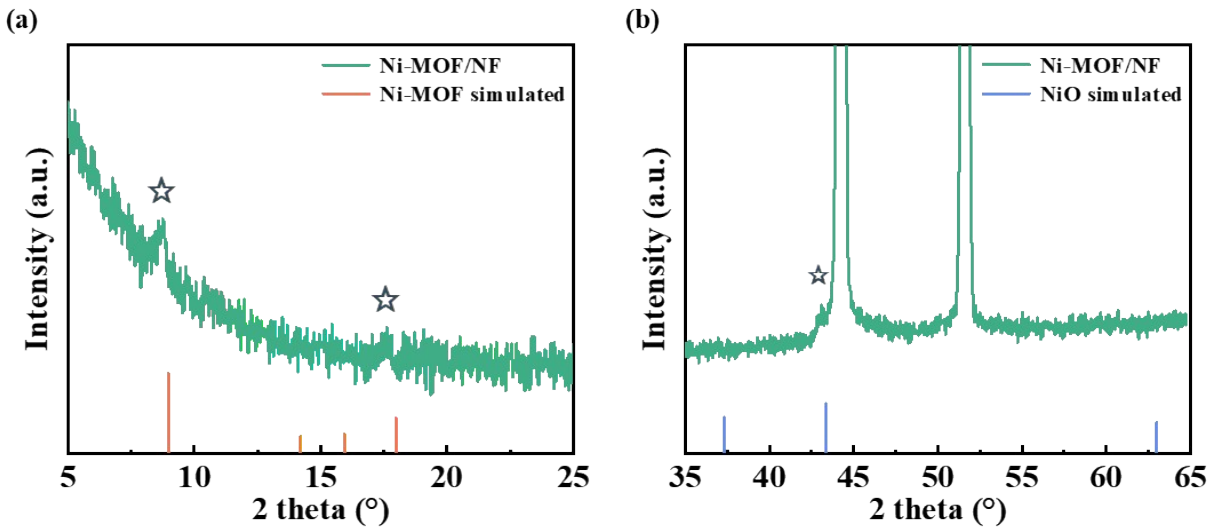

**Fig. S18** XRD pattern of Ni-MOF/NF after electrochemical tests at (a) low diffraction angle range and (b) high diffraction angle range.

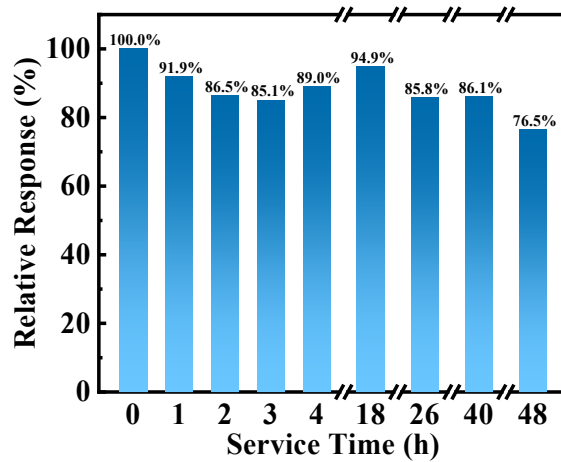

**Fig. S19** Service life evaluation by relative response of single electrode to 0.2 mM glucose versus service time.

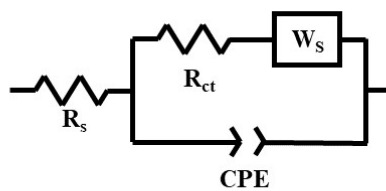

| Electrode      | $R_s$ ( $\Omega$ ) | $R_{ct}$ ( $\Omega$ ) |
|----------------|--------------------|-----------------------|
| Ni-MOF/CP (DC) | 22.51              | 20289                 |
| Ni-MOF/CP      | 21.24              | 5329                  |

**Fig. S20** Equivalent circuit diagram and the fitted results of EIS for Ni-MOF/CP and Ni-MOF/CP (DC) in PBS.

**Table S2** Comparison of nonprecious metal nanomaterials-based nonenzymatic glucose sensing electrodes working in neutral condition.

| Electrode                                | Sensitivity<br>( $\mu\text{A mM}^{-1} \text{cm}^{-2}$ ) | Linear Range<br>( $\mu\text{M}$ ) | LOD<br>( $\mu\text{M}$ ) | Electrolyte | Ref.      |
|------------------------------------------|---------------------------------------------------------|-----------------------------------|--------------------------|-------------|-----------|
| Ni-MOF/CP                                | 6.57                                                    | 200 ~ 7000                        | 198.25                   | PBS         | This work |
|                                          | 4.10                                                    | 7000 ~ 16000                      | -                        |             |           |
| MAF-5- $\text{Co}^{\text{II}}$ NSLOD/SPE | 24.22                                                   | 7.81 ~ 250                        | 0.3                      | PBS         | 11        |
|                                          | 1.32                                                    | 500 ~ 10000                       | -                        |             |           |
| FeBDC-derived $\text{Fe}_3\text{O}_4$    | 4.67                                                    | 0 ~ 9000                          | 15.7                     | PBS         | 12        |
| CPNs/GCE                                 | 0.00790                                                 | 1000 ~ 30000                      | 300                      | PBS         | 13        |
| FTO/[CoFe]                               | 18.69                                                   | 100 ~ 8200                        | 67                       | PBS         | 14        |
| Cu NWs-MOFs-GO/GE                        | 7.72                                                    | 20 ~ 26600                        | 7                        | PBS         | 15        |

## References

- 1 Y. Li, M. Xie, X. Zhang, Q. Liu, D. Lin, C. Xu, F. Xie and X. Sun, *Sens. Actuators, B*, 2019, **278**, 126–132.
- 2 Q. Du, Y. Liao, N. Shi, S. Sun, X. Liao, G. Yin, Z. Huang, X. Pu and J. Wang, *J. Electroanal. Chem.*, 2022, **904**, 115887.
- 3 P. Arul and S. A. John, *Electrochim. Acta*, 2019, **306**, 254–263.
- 4 B. Tao, H. Zheng, J. Li, F. Miao and P. Zhang, *Mater. Sci. Eng. B*, 2023, **298**, 116895.
- 5 M. Ma, W. Zhu, D. Zhao, Y. Ma, N. Hu, Y. Suo and J. Wang, *Sens. Actuators, B*, 2019, **278**, 110–116.
- 6 Y. Liu, W. Zhao, X. Li, J. Liu, Y. Han, J. Wu, X. Zhang and Y. Xu, *Appl. Surf. Sci.*, 2020, **512**, 145710.
- 7 P. Ma, R. Bi, Q. Wang, L. Lu, X. Ma and F. Chen, *Mater. Res. Bull.*, 2024, **170**, 112583.
- 8 S. Sun, N. Shi, X. Liao, B. Zhang, G. Yin, Z. Huang, X. Chen and X. Pu, *Appl. Surf. Sci.*, 2020, **529**, 147067.
- 9 C. Wang, L. Du, X. Xing, D. Feng, Y. Tian, Z. Li and D. Yang, *Appl. Surf. Sci.*, 2022, **586**, 152822.
- 10 S. Cheng, X. Gao, S. Delacruz, C. Chen, Z. Tang, T. Shi, C. Carraro and R. Maboudian, *J. Mater. Chem. B*, 2019, **7**, 4990–4996.
- 11 M. Adeel, V. Canzonieri, S. Daniele, A. Vomiero, F. Rizzolio and Md. M. Rahman, *Microchim. Acta*, 2021, **188**, 77.



- 12 S. A. Abrori, N. L. W. Septiani, Nugraha, I. Anshori, Suyatman, V. Suendo and B. Yulianto, *Sensors*, 2020, **20**, 4891.
- 13 P. P. Tomanin, P. V. Cherepanov, Q. A. Besford, A. J. Christofferson, A. Amodio, C. F. McConville, I. Yarovsky, F. Caruso and F. Cavaliere, *ACS Appl. Mater. Interfaces*, 2018, **10**, 42786–42795.
- 14 R. Chalil Oglou, T. G. Ulusoy Ghobadi, E. Ozbay and F. Karadas, *Anal. Chim. Acta*, 2021, **1188**, 339188.
- 15 G. Zang, W. Hao, X. Li, S. Huang, J. Gan, Z. Luo and Y. Zhang, *Electrochim. Acta*, 2018, **277**, 176–184.
